# Supplementary material
Source: PubMed Central journal article supplement (PMC10463174)
Supplement: jamapediatr-e233133-s001.pdf [file jamapediatr-e233133-s001.pdf]

## Supplementary Online Content

Aris IM, Perng W, Dabelea D, et al; Environmental Influences on Child Health Outcomes. Neighborhood opportunity and vulnerability and incident asthma among children. *JAMA Pediatr*. Published online August 28, 2023. doi:10.1001/jamapediatrics.2023.3133

**eTable 1.** Child Opportunity Index Indicators, Definitions, and Data Sources

**eTable 2.** Social Vulnerability Index Indicators, Definitions, and Data Sources

**eTable 3.** Characteristics of Children Included and Excluded From the Analytic Sample

**eTable 4.** Participant Characteristics According to Very Low and Very High Child Opportunity Index Categories at Each Life Stage

**eTable 5.** Participant Characteristics According to Very High and Very Low Social Vulnerability Index Categories at Each Life Stage

**eTable 6.** Secondary Analyses for the Association of Child Opportunity Index at Different Life Stages With Asthma Incidence

**eTable 7.** Leave-1-Out Analyses for the Association of Child Opportunity Index at Birth With Asthma Incidence

**eTable 8.** Leave-1-Out Analyses for the Association of Child Opportunity Index in Infancy With Asthma Incidence

**eTable 9.** Leave-1-Out Analyses for the Association of Child Opportunity Index in Early Childhood With Asthma Incidence

**eFigure 1.** Association of Domain-Specific Child Opportunity Index at Birth, Infancy, and Early Childhood With Asthma Incidence

**eFigure 2.** Association of Domain-Specific Social Vulnerability Index (SVI) at Birth, Infancy, and Early Childhood With Asthma Incidence

**eMethods.** Description of Child Opportunity Index and Social Vulnerability Index

This supplementary material has been provided by the authors to give readers additional information about their work.

**eTable 1: Child Opportunity Index indicators, definitions, and data sources<sup>a</sup>.**

| <b>Indicators</b>                                           | <b>Definition (Data source and Year)</b>                                                                                                                                                                                                        |
|-------------------------------------------------------------|-------------------------------------------------------------------------------------------------------------------------------------------------------------------------------------------------------------------------------------------------|
| <b><u>Education domain</u></b>                              |                                                                                                                                                                                                                                                 |
| 1. Early Childhood Education (ECE) centers                  | Number of ECE centers within a 5-mile radius (own data collection from state and federal sources; 2010)                                                                                                                                         |
| 2. High-quality ECE centers                                 | Number of National Association for the Education of Young Children accredited centers within a 5-mile radius (own data collection from state and federal sources; 2010)                                                                         |
| 3. ECE enrollment                                           | Percent 3- and 4-year-olds enrolled in nursery school, preschool or kindergarten (ACS; 2008–2012)                                                                                                                                               |
| 4. Third grade reading proficiency                          | Percent third graders scoring proficient on standardized reading tests, converted to NAEP scale score points (EDFacts, GS and SEDA; 2010)                                                                                                       |
| 5. Third grade math proficiency                             | Percent third graders scoring proficient on standardized math tests, converted to NAEP scale score points (EDFacts, GS and SEDA; 2010)                                                                                                          |
| 6. High school graduation rate                              | Percent ninth graders graduating from high school on time (EDFacts and GS; 2010)                                                                                                                                                                |
| 7. Advanced Placement (AP) course enrollment                | Ratio of students enrolled in at least one AP course to the number of 11th and 12th graders (CRDC; 2011)                                                                                                                                        |
| 8. College enrollment in nearby institutions                | Percent 18-24 year-olds enrolled in college within 25-mile radius (ACS; 2008–2012)                                                                                                                                                              |
| 9. School poverty                                           | Percent students in elementary schools eligible for free or reduced-price lunches, reversed (NCES CCD; 2010)                                                                                                                                    |
| 10. Teacher experience <sup>b</sup>                         | Percent teachers in their first and second year (CRDC; 2011)                                                                                                                                                                                    |
| 11. Adult educational attainment                            | Percent adults ages 25 and over with a college degree or higher (ACS; 2008–2012)                                                                                                                                                                |
| <b><u>Health and Environment domain</u></b>                 |                                                                                                                                                                                                                                                 |
| 1. Access to healthy food <sup>b</sup>                      | Percent households without a car located further than a half-mile from the nearest super-market, reversed (USDA; 2010)                                                                                                                          |
| 2. Access to green space <sup>b</sup>                       | Percent impenetrable surface areas such as rooftops, roads or parking lots (CDC; 2011)                                                                                                                                                          |
| 3. Walkability                                              | EPA Walkability Index (EPA; 2010–2012)                                                                                                                                                                                                          |
| 4. Housing vacancy rate <sup>b</sup>                        | Percent housing units that are vacant (ACS; 2008–2012)                                                                                                                                                                                          |
| 5. Hazardous waste dump sites <sup>b</sup>                  | Average number of Superfund sites within a 2-mile radius (EPA; 2010)                                                                                                                                                                            |
| 6. Industrial pollutants in air, water or soil <sup>b</sup> | Index of toxic chemicals released by industrial facilities (EPA; 2010)                                                                                                                                                                          |
| 7. Airborne microparticles <sup>b</sup>                     | Mean estimated microparticle (PM2.5) concentration (CDC; 2010)                                                                                                                                                                                  |
| 8. Ozone concentration <sup>b</sup>                         | Mean estimated 8-hour average ozone concentration (EPA; 2011)                                                                                                                                                                                   |
| 9. Extreme heat exposure <sup>b</sup>                       | Summer days with maximum temperature above 90 degrees Fahrenheit (CDC; 2009–2011)                                                                                                                                                               |
| 10. Health insurance coverage                               | Percent individuals ages 0-64 with health insurance coverage (ACS; 2008–2012)                                                                                                                                                                   |
| <b><u>Social and Economic domain</u></b>                    |                                                                                                                                                                                                                                                 |
| 1. Employment rate                                          | Percent adults ages 25-54 who are employed (ACS; 2008–2012)                                                                                                                                                                                     |
| 2. Commute duration <sup>b</sup>                            | Percent workers commuting more than one hour one way (ACS; 2008–2012)                                                                                                                                                                           |
| 3. Poverty rate <sup>b</sup>                                | Percent individuals living in households with incomes below 100% of the federal poverty threshold (ACS; 2008–2012)                                                                                                                              |
| 4. Public assistance rate <sup>b</sup>                      | Percent households receiving cash public assistance or Food Stamps/Supplemental Nutrition Assistance Program (ACS; 2008–2012)                                                                                                                   |
| 5. Home ownership rate                                      | Percent owner-occupied housing units (ACS; 2008–2012)                                                                                                                                                                                           |
| 6. High-skill employment                                    | Percent individuals ages 16 and over employed in management, business, financial, computer, engineering, science, education, legal, community service, health care practitioner, health technology, arts and media occupations (ACS; 2008–2012) |
| 7. Median household income                                  | Median income of all households (ACS; 2008–2012)                                                                                                                                                                                                |
| 8. Single-headed households <sup>b</sup>                    | Percent family households that are single-parent headed (ACS; 2008–2012)                                                                                                                                                                        |

<sup>a</sup> Adapted from the Child Opportunity Index: Technical Documentation (see reference #20).

<sup>b</sup> Scores are reversed, such that a higher score for the indicator reflects higher opportunity levels.

ACS: American Community Survey; CDC: Center for Disease Control and Prevention; CRDC: U.S. Department of Education Office for Civil Rights Data Collection; EDFacts: U.S. Department of Education Data Files; EPA: Environmental Protection Agency; GS: Great Schools data; NAEP: National Assessment of Educational Progress; NCES CCD: National Center for Education Statistics Common Core of Data; SEDA: Stanford Education Data Archive; USDA: U.S. Department of Agriculture

**eTable 2:** Social Vulnerability Index indicators, definitions, and data sources.

| <b>Indicators</b>                                  | <b>Definition (Data source)</b>                                                                |
|----------------------------------------------------|------------------------------------------------------------------------------------------------|
| <b><u>Socioeconomic</u></b>                        |                                                                                                |
| 1. Poverty                                         | Persons below poverty estimate (ACS; 2000–2018)                                                |
| 2. Unemployment                                    | Civilian (age 16+) unemployed estimate (ACS; 2000–2018)                                        |
| 3. Income                                          | Per capita income estimate (ACS; 2000–2018)                                                    |
| 4. High School Diploma                             | Persons (age 25+) with no high school diploma estimate (ACS; 2000–2018)                        |
| <b><u>Household Composition and Disability</u></b> |                                                                                                |
| 1. Aged 65 or Older                                | Persons aged 65 and older estimate (ACS; 2000–2018)                                            |
| 2. Aged 17 or Younger                              | Persons aged 17 and younger estimate (ACS; 2000–2018)                                          |
| 3. Civilian with a Disability                      | Civilian noninstitutionalized population with a disability estimate (ACS; 2000–2018)           |
| 4. Single-Parent Households                        | Single parent household with children under 18 estimate (ACS; 2000–2018)                       |
| <b><u>Minority Status and Language</u></b>         |                                                                                                |
| 1. Minority                                        | Minority (all persons except white, non-Hispanic) estimate (ACS; 2000–2018)                    |
| 2. Speaks English “Less than Well”                 | Persons (age 5+) who speak English "less than well" estimate (ACS; 2000–2018)                  |
| <b><u>Housing and Transportation</u></b>           |                                                                                                |
| 1. Multi-Unit Structures                           | Housing in structures with 10 or more units estimate (ACS; 2000–2018)                          |
| 2. Mobile Homes                                    | Mobile homes estimate (ACS; 2000–2018)                                                         |
| 3. Crowding                                        | At household level (occupied housing units), more people than rooms estimate (ACS; 2000–2018)  |
| 4. No Vehicle                                      | Households with no vehicle available estimate (ACS; 2000–2018)                                 |
| 5. Group Quarters                                  | Persons in institutionalized and noninstitutionalized group quarters estimate (ACS; 2000–2018) |

ACS: American Community Survey.

**eTable 3:** Characteristics of children included and excluded from the analytic sample.

| Characteristic                                                             | Excluded<br>N = 17,421    | Included<br>N = 10,516 | p-value |
|----------------------------------------------------------------------------|---------------------------|------------------------|---------|
| <b>Birth year</b>                                                          | <b>N (%) or mean (SD)</b> |                        | <0.001  |
| . Before 2000                                                              | 8 (0.1%)                  | 107 (1.0%)             |         |
| . 2000 to 2010                                                             | 1,883 (14.0%)             | 3,596 (34.2%)          |         |
| . After 2010                                                               | 11,560 (85.9%)            | 6,813 (64.8%)          |         |
| <b>Child sex</b>                                                           |                           |                        | 0.15    |
| . Male                                                                     | 8,898 (51.4%)             | 5,494 (52.2%)          |         |
| . Female                                                                   | 8,426 (48.6%)             | 5,022 (47.8%)          |         |
| <b>Child race</b>                                                          |                           |                        | <0.001  |
| . White                                                                    | 9,717 (60.5%)             | 6,768 (65.3%)          |         |
| . Black                                                                    | 2,247 (14.0%)             | 1,915 (18.5%)          |         |
| . Asian                                                                    | 710 (4.4%)                | 208 (2.0%)             |         |
| . Native Hawaiian or Pacific Islander, American Indian<br>or Alaska Native | 409 (2.5%)                | 204 (2.0%)             |         |
| . Other race or More than one race                                         | 2,981 (18.6%)             | 1,269 (12.2%)          |         |
| <b>Hispanic ethnicity</b>                                                  | 4,208 (25.5%)             | 1,576 (15.0%)          | <0.001  |
| <b>Mode of delivery</b>                                                    |                           |                        | <0.001  |
| . Vaginal                                                                  | 9,283 (68.4%)             | 5,923 (65.2%)          |         |
| . Caesarean                                                                | 4,283 (31.6%)             | 3,155 (34.8%)          |         |
| <b>Gestational age at delivery (weeks)</b>                                 | 38.5 (2.3)                | 37.0 (5.0)             | <0.001  |
| <b>Education level during pregnancy</b>                                    |                           |                        | 0.008   |
| . Less than high school                                                    | 976 (8.6%)                | 474 (8.7%)             |         |
| . High school degree or equivalent                                         | 1,849 (16.3%)             | 993 (18.2%)            |         |
| . Some college, no degree                                                  | 2,557 (22.5%)             | 1,239 (22.7%)          |         |
| . College degree and above                                                 | 5,987 (52.7%)             | 2,751 (50.4%)          |         |
| <b>Household income during pregnancy</b>                                   |                           |                        | <0.001  |
| . < \$50,000/year                                                          | 3,674 (40.7%)             | 2,635 (55.4%)          |         |
| . ≥ \$50,000/year                                                          | 5,349 (59.3%)             | 2,120 (44.6%)          |         |
| <b>parity</b>                                                              |                           |                        | <0.001  |
| . Nulliparous                                                              | 5,147 (40.7%)             | 2,915 (38.1%)          |         |
| . Multiparous                                                              | 7,504 (59.3%)             | 4,734 (61.9%)          |         |
| <b>Cigarette smoking during pregnancy</b>                                  |                           |                        | <0.001  |
| . No                                                                       | 11,535 (93.9%)            | 6,618 (87.3%)          |         |
| . Yes                                                                      | 755 (6.1%)                | 965 (12.7%)            |         |
| <b>Second-hand smoke exposure during pregnancy</b>                         |                           |                        | <0.001  |
| . No                                                                       | 10,455 (83.7%)            | 4,405 (73.4%)          |         |
| . Yes                                                                      | 2,041 (16.3%)             | 1,596 (26.6%)          |         |
| <b>Maternal pre-pregnancy body mass index (kg/m<sup>2</sup>)</b>           | 27.0 (7.0)                | 27.1 (7.1)             | 0.43    |
| <b>Maternal asthma history</b>                                             |                           |                        | 0.003   |
| . No                                                                       | 2,781 (73.5%)             | 3,129.0 (76.4%)        |         |
| . Yes                                                                      | 1,004 (26.5%)             | 969.0 (23.6%)          |         |
| <b>Paternal asthma history</b>                                             |                           |                        | <0.001  |
| . No                                                                       | 2,004 (87.2%)             | 2,741.0 (83.9%)        |         |
| . Yes                                                                      | 295 (12.8%)               | 527.0 (16.1%)          |         |

**eTable 4:** Participant characteristics according to very low and very high Child Opportunity Index categories at each life stage.

| Overall ChOI categories                                                 | Birth                 |                        | Infancy               |                        | Early childhood       |                        |
|-------------------------------------------------------------------------|-----------------------|------------------------|-----------------------|------------------------|-----------------------|------------------------|
|                                                                         | Very low<br>N = 2,100 | Very high<br>N = 2,263 | Very low<br>N = 2,105 | Very high<br>N = 2,360 | Very low<br>N = 2,034 | Very high<br>N = 2,573 |
| <b>Domain specific ChOI percentile rank</b>                             | Mean (SD) or %        |                        | Mean (SD) or %        |                        | Mean (SD) or %        |                        |
| . Education                                                             | 18.2 (14.1)           | 81.5 (12.4)            | 17.7 (14.0)           | 81.5 (12.8)            | 17.1 (13.6)           | 82.0 (13.1)            |
| . Health and Environment                                                | 18.7 (20.7)           | 79.7 (17.0)            | 19.8 (21.2)           | 80.3 (16.9)            | 21.2 (22.2)           | 82.0 (16.1)            |
| . Social and Economic                                                   | 9.4 (6.8)             | 90.3 (6.8)             | 9.2 (6.7)             | 90.2 (7.0)             | 9.1 (6.6)             | 90.3 (7.1)             |
| <b>Rurality of residence</b>                                            |                       |                        |                       |                        |                       |                        |
| . Metropolitan                                                          | 96.5                  | 95.2                   | 96.1                  | 95.6                   | 95.4                  | 96.1                   |
| . Micropolitan                                                          | 2.1                   | 2.3                    | 2.5                   | 2.1                    | 2.9                   | 1.8                    |
| . Small town/rural areas                                                | 1.4                   | 2.5                    | 1.4                   | 2.3                    | 1.7                   | 2.1                    |
| <b>Birth year</b>                                                       |                       |                        |                       |                        |                       |                        |
| . Before 2000                                                           | 0.3                   | 1.3                    | 0.4                   | 1.3                    | 0.3                   | 1.3                    |
| . 2000 to 2010                                                          | 38.8                  | 29.6                   | 40.1                  | 28.9                   | 42.4                  | 30.0                   |
| . After 2010                                                            | 60.9                  | 69.1                   | 59.5                  | 69.8                   | 57.2                  | 68.7                   |
| <b>Child sex</b>                                                        |                       |                        |                       |                        |                       |                        |
| . Male                                                                  | 50.7                  | 51.6                   | 50.4                  | 51.5                   | 50.9                  | 51.6                   |
| . Female                                                                | 49.3                  | 48.4                   | 49.6                  | 48.5                   | 40.1                  | 48.4                   |
| <b>Child race</b>                                                       |                       |                        |                       |                        |                       |                        |
| . White                                                                 | 26.6                  | 85.0                   | 25.7                  | 85.3                   | 24.5                  | 84.3                   |
| . Black                                                                 | 53.8                  | 2.9                    | 54.8                  | 2.7                    | 56.0                  | 3.0                    |
| . Asian                                                                 | 0.9                   | 2.3                    | 0.8                   | 2.5                    | 0.7                   | 2.8                    |
| . Native Hawaiian or Pacific Islander, American Indian or Alaska Native | 2.9                   | 0.5                    | 2.9                   | 0.5                    | 2.7                   | 0.5                    |
| . Other race or More than one race                                      | 15.9                  | 9.3                    | 15.9                  | 9.1                    | 16.0                  | 9.4                    |
| <b>Hispanic ethnicity</b>                                               | 22.5                  | 6.9                    | 22.7                  | 6.4                    | 23.2                  | 6.3                    |
| <b>Education level during pregnancy</b>                                 |                       |                        |                       |                        |                       |                        |
| . Less than high school                                                 | 18.4                  | 2.5                    | 19.0                  | 2.4                    | 19.6                  | 2.3                    |
| . High school degree or equivalent                                      | 31.9                  | 8.0                    | 32.8                  | 7.6                    | 33.5                  | 7.4                    |
| . Some college, no degree                                               | 26.9                  | 16.2                   | 26.4                  | 15.9                   | 26.4                  | 15.9                   |
| . College degree and above                                              | 22.8                  | 73.3                   | 21.7                  | 74.1                   | 20.4                  | 74.3                   |
| <b>Household income during pregnancy</b>                                |                       |                        |                       |                        |                       |                        |
| . < \$50,000/year                                                       | 80.3                  | 31.2                   | 81.1                  | 30.8                   | 82.1                  | 30.7                   |
| . ≥ \$50,000/year                                                       | 19.7                  | 68.8                   | 18.9                  | 69.2                   | 17.9                  | 69.3                   |
| <b>Cigarette smoking during pregnancy</b>                               | 16.3                  | 6.3                    | 16.8                  | 6.3                    | 17.0                  | 6.5                    |
| <b>Second-hand smoke exposure during pregnancy</b>                      | 32.1                  | 25.0                   | 32.6                  | 24.5                   | 32.9                  | 24.7                   |
| <b>Nulliparous</b>                                                      | 36.4                  | 37.3                   | 36.7                  | 37.7                   | 35.6                  | 38.2                   |
| <b>Mode of delivery</b>                                                 |                       |                        |                       |                        |                       |                        |
| . Vaginal                                                               | 64.4                  | 70.6                   | 63.8                  | 70.4                   | 64.4                  | 69.3                   |
| . Caesarean                                                             | 35.6                  | 29.4                   | 36.2                  | 29.6                   | 35.6                  | 30.7                   |
| <b>Maternal asthma history</b>                                          | 28.9                  | 21.2                   | 28.8                  | 21.2                   | 29.0                  | 21.1                   |
| <b>Paternal asthma history</b>                                          | 16.6                  | 15.7                   | 16.5                  | 15.7                   | 16.5                  | 15.7                   |
| <b>Maternal pre-pregnancy body mass index (kg/m<sup>2</sup>)</b>        | 29.0 (8.1)            | 25.4 (6.2)             | 29.0 (8.1)            | 25.3 (6.0)             | 29.0 (8.1)            | 25.3 (6.2)             |
| <b>Gestational age at delivery (weeks)</b>                              | 37.2 (4.4)            | 37.6 (4.6)             | 37.1 (4.5)            | 37.7 (4.6)             | 37.1 (4.6)            | 37.8 (4.5)             |

**eTable 5:** Participant characteristics according to very high and very low Social Vulnerability Index categories at each life stage.

| Overall SVI categories                                                  | Birth                  |                       | Infancy                |                       | Early childhood        |                       |
|-------------------------------------------------------------------------|------------------------|-----------------------|------------------------|-----------------------|------------------------|-----------------------|
|                                                                         | Very high<br>N = 1,994 | Very low<br>N = 2,390 | Very high<br>N = 2,032 | Very low<br>N = 2,434 | Very high<br>N = 1,971 | Very low<br>N = 2,550 |
| <b>Domain specific SVI percentile rank</b>                              | Mean (SD) or %         |                       | Mean (SD) or %         |                       | Mean (SD) or %         |                       |
| . Socioeconomic                                                         | 0.9 (0.1)              | 0.1 (0.1)             | 0.9 (0.1)              | 0.1 (0.1)             | 0.9 (0.1)              | 0.1 (0.1)             |
| . Household composition                                                 | 0.8 (0.2)              | 0.3 (0.2)             | 0.8 (0.2)              | 0.3 (0.2)             | 0.8 (0.2)              | 0.3 (0.2)             |
| . Minority status/language                                              | 0.8 (0.2)              | 0.3 (0.2)             | 0.8 (0.2)              | 0.3 (0.2)             | 0.8 (0.2)              | 0.3 (0.2)             |
| . Housing type/Transportation                                           | 0.8 (0.2)              | 0.2 (0.2)             | 0.8 (0.2)              | 0.2 (0.2)             | 0.8 (0.2)              | 0.2 (0.2)             |
| <b>Rurality of residence</b>                                            |                        |                       |                        |                       |                        |                       |
| . Metropolitan                                                          | 95.1                   | 94.7                  | 94.3                   | 95.6                  | 95.0                   | 95.5                  |
| . Micropolitan                                                          | 3.2                    | 3.0                   | 3.5                    | 2.5                   | 3.4                    | 3.0                   |
| . Small town/rural areas                                                | 1.7                    | 2.3                   | 2.1                    | 1.9                   | 1.6                    | 1.5                   |
| <b>Birth year</b>                                                       |                        |                       |                        |                       |                        |                       |
| . Before 2000                                                           | 0.4                    | 1.2                   | 0.4                    | 1.1                   | 0.5                    | 1.1                   |
| . 2000 to 2010                                                          | 35.9                   | 30.2                  | 35.8                   | 30.2                  | 37.3                   | 32.3                  |
| . After 2010                                                            | 63.7                   | 68.6                  | 63.8                   | 68.7                  | 62.2                   | 66.6                  |
| <b>Child sex</b>                                                        |                        |                       |                        |                       |                        |                       |
| . Male                                                                  | 51.4                   | 52.1                  | 51.4                   | 52.0                  | 51.8                   | 52.0                  |
| . Female                                                                | 48.6                   | 47.9                  | 48.6                   | 48.0                  | 48.2                   | 48.0                  |
| <b>Child race</b>                                                       |                        |                       |                        |                       |                        |                       |
| . White                                                                 | 31.5                   | 86.7                  | 31.9                   | 86.1                  | 31.3                   | 84.8                  |
| . Black                                                                 | 46.6                   | 4.1                   | 46.7                   | 4.2                   | 47.5                   | 4.5                   |
| . Asian                                                                 | 1.1                    | 1.7                   | 1.2                    | 2.0                   | 1.2                    | 2.2                   |
| . Native Hawaiian or Pacific Islander, American Indian or Alaska Native | 2.8                    | 0.7                   | 2.8                    | 0.7                   | 2.8                    | 0.5                   |
| . Other race or More than one race                                      | 18.0                   | 6.8                   | 17.4                   | 7.1                   | 17.2                   | 7.9                   |
| <b>Hispanic ethnicity</b>                                               | 27.1                   | 6.1                   | 27.2                   | 5.9                   | 28.4                   | 6.0                   |
| <b>Education level during pregnancy</b>                                 |                        |                       |                        |                       |                        |                       |
| . Less than high school                                                 | 17.8                   | 2.8                   | 18.1                   | 2.8                   | 18.9                   | 2.7                   |
| . High school degree or equivalent                                      | 30.1                   | 8.7                   | 30.6                   | 8.8                   | 30.6                   | 8.4                   |
| . Some college, no degree                                               | 27.3                   | 17.5                  | 27.0                   | 17.0                  | 27.8                   | 17.5                  |
| . College degree and above                                              | 24.8                   | 71.0                  | 24.3                   | 71.5                  | 22.7                   | 71.3                  |
| <b>Household income during pregnancy</b>                                |                        |                       |                        |                       |                        |                       |
| . < \$50,000/year                                                       | 76.7                   | 34.1                  | 76.9                   | 33.8                  | 77.9                   | 33.5                  |
| . ≥ \$50,000/year                                                       | 23.3                   | 65.9                  | 23.1                   | 66.2                  | 22.1                   | 66.5                  |
| <b>Cigarette smoking during pregnancy</b>                               | 15.7                   | 7.0                   | 16.1                   | 6.9                   | 16.5                   | 6.9                   |
| <b>Second-hand smoke exposure during pregnancy</b>                      | 31.7                   | 24.3                  | 32.0                   | 23.6                  | 32.3                   | 24.1                  |
| <b>Nulliparous</b>                                                      | 37.9                   | 37.2                  | 38.5                   | 37.1                  | 37.2                   | 37.6                  |
| <b>Mode of delivery</b>                                                 |                        |                       |                        |                       |                        |                       |
| . Vaginal                                                               | 64.1                   | 70.0                  | 63.2                   | 70.1                  | 64.2                   | 69.8                  |
| . Caesarean                                                             | 35.9                   | 30.0                  | 36.8                   | 29.9                  | 35.8                   | 30.2                  |
| <b>Maternal asthma history</b>                                          | 28.6                   | 20.7                  | 28.3                   | 20.4                  | 28.1                   | 20.4                  |
| <b>Paternal asthma history</b>                                          | 16.5                   | 16.3                  | 16.4                   | 16.4                  | 16.2                   | 15.6                  |
| <b>Maternal pre-pregnancy body mass index (kg/m<sup>2</sup>)</b>        | 28.9 (8.0)             | 25.6 (6.3)            | 28.9 (8.1)             | 25.6 (6.2)            | 28.9 (8.0)             | 25.5 (6.2)            |
| <b>Gestational age at delivery (weeks)</b>                              | 36.9 (4.7)             | 37.7 (4.5)            | 37.0 (4.7)             | 37.7 (4.5)            | 37.0 (4.8)             | 37.7 (4.3)            |

**eTable 6:** Secondary analyses for the association of Child Opportunity Index (ChOI) at different life stages with asthma incidence.

| ChOI categories         | Incidence rate ratio (95% CI) |                   |                   |                   |                   |
|-------------------------|-------------------------------|-------------------|-------------------|-------------------|-------------------|
|                         | Crude model                   | Model A           | Model B           | Model C           | Model D           |
| <b>Birth</b>            |                               |                   |                   |                   |                   |
| . Very Low Opportunity  | reference                     | reference         | reference         | reference         | reference         |
| . Low Opportunity       | 0.77 (0.67, 0.88)             | 0.89 (0.77, 1.02) | 0.88 (0.76, 1.02) | 0.88 (0.76, 1.02) | 0.96 (0.79, 1.16) |
| . Moderate Opportunity  | 0.70 (0.61, 0.80)             | 0.87 (0.75, 1.00) | 0.86 (0.74, 1.00) | 0.97 (0.84, 1.12) | 0.86 (0.71, 1.05) |
| . High Opportunity      | 0.66 (0.58, 0.75)             | 0.87 (0.75, 1.00) | 0.87 (0.75, 1.00) | 0.89 (0.77, 1.03) | 0.92 (0.75, 1.12) |
| . Very High Opportunity | 0.61 (0.53, 0.69)             | 0.83 (0.71, 0.98) | 0.84 (0.72, 0.99) | 0.89 (0.76, 1.04) | 0.80 (0.65, 1.00) |
| <b>Infancy</b>          |                               |                   |                   |                   |                   |
| . Very Low Opportunity  | reference                     | reference         | reference         | reference         | reference         |
| . Low Opportunity       | 0.75 (0.65, 0.86)             | 0.85 (0.73, 0.99) | 0.85 (0.73, 0.98) | 0.88 (0.76, 1.01) | 0.89 (0.74, 1.08) |
| . Moderate Opportunity  | 0.71 (0.62, 0.81)             | 0.87 (0.75, 1.01) | 0.87 (0.75, 1.01) | 0.95 (0.82, 1.10) | 0.87 (0.72, 1.05) |
| . High Opportunity      | 0.63 (0.55, 0.72)             | 0.82 (0.71, 0.96) | 0.82 (0.71, 0.96) | 0.83 (0.72, 0.97) | 0.85 (0.70, 1.04) |
| . Very High Opportunity | 0.61 (0.53, 0.69)             | 0.83 (0.71, 0.97) | 0.84 (0.72, 0.99) | 0.84 (0.72, 0.98) | 0.79 (0.64, 0.98) |
| <b>Early Childhood</b>  |                               |                   |                   |                   |                   |
| . Very Low Opportunity  | reference                     | reference         | reference         | reference         | reference         |
| . Low Opportunity       | 0.70 (0.61, 0.82)             | 0.81 (0.69, 0.94) | 0.80 (0.69, 0.93) | 0.91 (0.76, 1.09) | 0.86 (0.71, 1.04) |
| . Moderate Opportunity  | 0.75 (0.65, 0.86)             | 0.91 (0.78, 1.06) | 0.91 (0.78, 1.05) | 1.00 (0.85, 1.19) | 0.89 (0.74, 1.07) |
| . High Opportunity      | 0.61 (0.53, 0.70)             | 0.79 (0.68, 0.92) | 0.79 (0.68, 0.93) | 0.84 (0.70, 1.00) | 0.81 (0.67, 0.99) |
| . Very High Opportunity | 0.59 (0.52, 0.68)             | 0.80 (0.68, 0.94) | 0.81 (0.69, 0.95) | 0.92 (0.77, 1.09) | 0.84 (0.69, 1.02) |

Model A: Adjusted for sociodemographic characteristics, parental asthma history, and parity.

Model B: Adjusted for sociodemographic characteristics, parental asthma history, parity, prenatal cigarette smoking, prenatal second-hand smoke exposure, pre-pregnancy body mass index, mode of delivery, and gestational age.

Model C: Adjusted for sociodemographic characteristics, parental asthma history, parity, and body mass index in early childhood.

Model D: Analyses restricted to residential addresses that were obtained during or after the year 2010, and adjusted for sociodemographic characteristics, parental asthma history, parity, prenatal cigarette smoking, prenatal second-hand smoke exposure, pre-pregnancy body mass index, mode of delivery, and gestational age.

**eTable 7:** “Leave-one-out” analyses for the association of Child Opportunity Index (ChOI) at birth with asthma incidence. All incidence rate ratios (IRR) and 95% confidence intervals are relative to the very low opportunity category.

| ChOI category | Excluded cohort no. | IRR (95% CI)      |
|---------------|---------------------|-------------------|---------------------|-------------------|---------------------|-------------------|---------------------|-------------------|---------------------|-------------------|
| Low           | 1                   | 0.88 (0.76, 1.02) | 11                  | 0.88 (0.76, 1.02) | 21                  | 0.89 (0.77, 1.02) | 31                  | 0.88 (0.76, 1.02) | 41                  | 0.89 (0.77, 1.03) |
| Moderate      |                     | 0.86 (0.74, 1)    |                     | 0.86 (0.74, 1)    |                     | 0.87 (0.75, 1)    |                     | 0.86 (0.74, 1)    |                     |                   |
| High          |                     | 0.87 (0.75, 1.01) |                     | 0.87 (0.75, 1.01) |                     | 0.87 (0.75, 1.01) |                     | 0.87 (0.75, 1.01) |                     |                   |
| Very High     |                     | 0.84 (0.72, 0.99) |                     | 0.85 (0.72, 0.99) |                     | 0.85 (0.72, 0.99) |                     | 0.85 (0.72, 0.99) |                     |                   |
| Low           | 2                   | 0.86 (0.74, 1)    | 12                  | 0.88 (0.76, 1.02) | 22                  | 0.88 (0.76, 1.02) | 32                  | 0.88 (0.76, 1.02) | 42                  | 0.89 (0.77, 1.03) |
| Moderate      |                     | 0.88 (0.75, 1.02) |                     | 0.86 (0.74, 1)    |                     | 0.87 (0.75, 1.01) |                     | 0.86 (0.74, 1)    |                     |                   |
| High          |                     | 0.86 (0.74, 1.01) |                     | 0.87 (0.75, 1.01) |                     | 0.87 (0.75, 1.01) |                     | 0.87 (0.74, 1.01) |                     |                   |
| Very High     |                     | 0.84 (0.71, 0.98) |                     | 0.84 (0.72, 0.99) |                     | 0.85 (0.72, 0.99) |                     | 0.84 (0.72, 0.98) |                     |                   |
| Low           | 3                   | 0.89 (0.77, 1.03) | 13                  | 0.88 (0.76, 1.02) | 23                  | 0.87 (0.75, 1.01) | 33                  | 0.88 (0.76, 1.01) | 43                  | 0.88 (0.76, 1.02) |
| Moderate      |                     | 0.87 (0.75, 1.01) |                     | 0.86 (0.74, 1)    |                     | 0.85 (0.73, 0.99) |                     | 0.87 (0.75, 1.01) |                     |                   |
| High          |                     | 0.87 (0.75, 1.01) |                     | 0.87 (0.75, 1.01) |                     | 0.86 (0.73, 1)    |                     | 0.87 (0.75, 1.01) |                     |                   |
| Very High     |                     | 0.85 (0.72, 0.99) |                     | 0.85 (0.72, 0.99) |                     | 0.83 (0.7, 0.97)  |                     | 0.84 (0.72, 0.99) |                     |                   |
| Low           | 4                   | 0.88 (0.76, 1.02) | 14                  | 0.88 (0.76, 1.02) | 24                  | 0.88 (0.76, 1.02) | 34                  | 0.88 (0.76, 1.02) | 44                  | 0.88 (0.76, 1.02) |
| Moderate      |                     | 0.86 (0.74, 1)    |                     | 0.86 (0.74, 1)    |                     | 0.85 (0.73, 0.99) |                     | 0.87 (0.75, 1.01) |                     |                   |
| High          |                     | 0.87 (0.75, 1.01) |                     | 0.86 (0.74, 1)    |                     | 0.87 (0.74, 1.01) |                     | 0.87 (0.75, 1.01) |                     |                   |
| Very High     |                     | 0.84 (0.72, 0.99) |                     | 0.85 (0.73, 1)    |                     | 0.83 (0.71, 0.97) |                     | 0.85 (0.72, 0.99) |                     |                   |
| Low           | 5                   | 0.85 (0.74, 0.99) | 15                  | 0.9 (0.77, 1.04)  | 25                  | 0.9 (0.78, 1.05)  | 35                  | 0.88 (0.76, 1.02) | 45                  | 0.88 (0.76, 1.02) |
| Moderate      |                     | 0.84 (0.73, 0.98) |                     | 0.86 (0.74, 1.01) |                     | 0.87 (0.74, 1.01) |                     | 0.85 (0.73, 1)    |                     |                   |
| High          |                     | 0.84 (0.72, 0.99) |                     | 0.88 (0.75, 1.02) |                     | 0.88 (0.75, 1.03) |                     | 0.88 (0.75, 1.03) |                     |                   |
| Very High     |                     | 0.83 (0.71, 0.97) |                     | 0.85 (0.72, 0.99) |                     | 0.84 (0.71, 0.98) |                     | 0.8 (0.68, 0.95)  |                     |                   |
| Low           | 6                   | 0.88 (0.76, 1.02) | 16                  | 0.89 (0.77, 1.03) | 26                  | 0.88 (0.76, 1.02) | 36                  | 0.88 (0.76, 1.03) | 46                  | 0.9 (0.78, 1.05)  |
| Moderate      |                     | 0.86 (0.74, 1)    |                     | 0.85 (0.73, 0.99) |                     | 0.87 (0.74, 1.01) |                     | 0.85 (0.73, 0.99) |                     |                   |
| High          |                     | 0.87 (0.75, 1.01) |                     | 0.86 (0.74, 1)    |                     | 0.86 (0.74, 1)    |                     | 0.86 (0.74, 1.01) |                     |                   |
| Very High     |                     | 0.84 (0.72, 0.98) |                     | 0.85 (0.72, 1)    |                     | 0.83 (0.7, 0.97)  |                     | 0.84 (0.71, 0.99) |                     |                   |
| Low           | 7                   | 0.88 (0.76, 1.02) | 17                  | 0.88 (0.76, 1.02) | 27                  | 0.88 (0.76, 1.02) | 37                  | 0.86 (0.74, 0.99) |                     |                   |
| Moderate      |                     | 0.87 (0.75, 1)    |                     | 0.87 (0.74, 1.01) |                     | 0.85 (0.73, 1)    |                     | 0.86 (0.74, 1.01) |                     |                   |
| High          |                     | 0.87 (0.75, 1.01) |                     | 0.85 (0.73, 0.99) |                     | 0.89 (0.76, 1.04) |                     | 0.87 (0.74, 1.01) |                     |                   |
| Very High     |                     | 0.85 (0.72, 0.99) |                     | 0.84 (0.72, 0.99) |                     | 0.86 (0.73, 1.01) |                     | 0.84 (0.72, 0.99) |                     |                   |
| Low           | 8                   | 0.88 (0.76, 1.02) | 18                  | 0.89 (0.77, 1.03) | 28                  | 0.88 (0.76, 1.02) | 38                  | 0.88 (0.76, 1.02) |                     |                   |
| Moderate      |                     | 0.86 (0.74, 1)    |                     | 0.87 (0.75, 1.01) |                     | 0.86 (0.74, 1)    |                     | 0.86 (0.74, 1)    |                     |                   |
| High          |                     | 0.87 (0.74, 1.01) |                     | 0.88 (0.75, 1.02) |                     | 0.87 (0.75, 1.02) |                     | 0.87 (0.75, 1.01) |                     |                   |
| Very High     |                     | 0.84 (0.72, 0.99) |                     | 0.86 (0.73, 1.01) |                     | 0.84 (0.72, 0.99) |                     | 0.85 (0.72, 0.99) |                     |                   |
| Low           | 9                   | 0.87 (0.75, 1)    | 19                  | 0.88 (0.76, 1.02) | 29                  | 0.88 (0.76, 1.02) | 39                  | 0.88 (0.76, 1.02) |                     |                   |
| Moderate      |                     | 0.88 (0.76, 1.02) |                     | 0.86 (0.74, 1)    |                     | 0.86 (0.74, 0.99) |                     | 0.86 (0.74, 1)    |                     |                   |
| High          |                     | 0.86 (0.74, 1.01) |                     | 0.87 (0.75, 1.01) |                     | 0.87 (0.75, 1.01) |                     | 0.87 (0.75, 1.01) |                     |                   |
| Very High     |                     | 0.87 (0.74, 1.02) |                     | 0.84 (0.72, 0.99) |                     | 0.85 (0.72, 1)    |                     | 0.84 (0.72, 0.99) |                     |                   |
| Low           | 10                  | 0.88 (0.76, 1.02) | 20                  | 0.87 (0.75, 1.01) | 30                  | 0.88 (0.76, 1.02) | 40                  | 0.88 (0.76, 1.02) |                     |                   |
| Moderate      |                     | 0.86 (0.74, 1)    |                     | 0.89 (0.76, 1.04) |                     | 0.86 (0.74, 1)    |                     | 0.86 (0.74, 1)    |                     |                   |
| High          |                     | 0.87 (0.74, 1.01) |                     | 0.89 (0.76, 1.04) |                     | 0.87 (0.75, 1.01) |                     | 0.87 (0.75, 1.01) |                     |                   |
| Very High     |                     | 0.85 (0.72, 0.99) |                     | 0.86 (0.73, 1.02) |                     | 0.84 (0.72, 0.99) |                     | 0.85 (0.72, 0.99) |                     |                   |



**eTable 8:** “Leave-one-out” analyses for the association of Child Opportunity Index (ChOI) in infancy with asthma incidence. All incidence rate ratios (IRR) and 95% confidence intervals are relative to the very low opportunity category.

| ChOI category | Excluded cohort no. | IRR (95% CI)      |
|---------------|---------------------|-------------------|---------------------|-------------------|---------------------|-------------------|---------------------|-------------------|---------------------|-------------------|
| Low           | 1                   | 0.85 (0.74, 0.99) | 11                  | 0.85 (0.74, 0.98) | 21                  | 0.85 (0.74, 0.99) | 31                  | 0.85 (0.73, 0.98) | 41                  | 0.86 (0.74, 0.99) |
| Moderate      |                     | 0.87 (0.75, 1.01) |                     | 0.87 (0.75, 1.01) |                     | 0.87 (0.76, 1.01) |                     | 0.87 (0.75, 1.01) |                     | 0.88 (0.76, 1.02) |
| High          |                     | 0.83 (0.71, 0.96) |                     | 0.83 (0.71, 0.96) |                     | 0.83 (0.71, 0.96) |                     | 0.83 (0.71, 0.96) |                     | 0.81 (0.69, 0.95) |
| Very High     |                     | 0.85 (0.72, 0.99) |                     | 0.85 (0.72, 0.99) |                     | 0.85 (0.72, 0.99) |                     | 0.84 (0.72, 0.99) |                     | 0.85 (0.72, 0.99) |
| Low           | 2                   | 0.84 (0.72, 0.97) | 12                  | 0.85 (0.73, 0.98) | 22                  | 0.85 (0.74, 0.98) | 32                  | 0.85 (0.73, 0.98) | 42                  | 0.86 (0.74, 0.99) |
| Moderate      |                     | 0.87 (0.75, 1.02) |                     | 0.87 (0.75, 1.01) |                     | 0.88 (0.76, 1.01) |                     | 0.87 (0.75, 1.01) |                     | 0.88 (0.76, 1.02) |
| High          |                     | 0.82 (0.7, 0.96)  |                     | 0.82 (0.71, 0.96) |                     | 0.83 (0.71, 0.97) |                     | 0.82 (0.71, 0.96) |                     | 0.83 (0.71, 0.96) |
| Very High     |                     | 0.84 (0.71, 0.98) |                     | 0.84 (0.72, 0.99) |                     | 0.84 (0.72, 0.99) |                     | 0.84 (0.72, 0.98) |                     | 0.85 (0.72, 0.99) |
| Low           | 3                   | 0.85 (0.74, 0.99) | 13                  | 0.85 (0.73, 0.98) | 23                  | 0.85 (0.73, 0.98) | 33                  | 0.85 (0.73, 0.98) | 43                  | 0.84 (0.73, 0.98) |
| Moderate      |                     | 0.87 (0.75, 1.01) |                     | 0.87 (0.75, 1)    |                     | 0.87 (0.75, 1.01) |                     | 0.87 (0.75, 1.01) |                     | 0.87 (0.75, 1.01) |
| High          |                     | 0.82 (0.71, 0.96) |                     | 0.83 (0.71, 0.97) |                     | 0.82 (0.71, 0.96) |                     | 0.82 (0.71, 0.96) |                     | 0.83 (0.71, 0.96) |
| Very High     |                     | 0.84 (0.72, 0.99) |                     | 0.85 (0.72, 0.99) |                     | 0.83 (0.71, 0.98) |                     | 0.84 (0.72, 0.98) |                     | 0.85 (0.73, 1)    |
| Low           | 4                   | 0.85 (0.73, 0.98) | 14                  | 0.85 (0.73, 0.98) | 24                  | 0.85 (0.73, 0.98) | 34                  | 0.85 (0.73, 0.98) | 44                  | 0.85 (0.73, 0.98) |
| Moderate      |                     | 0.87 (0.75, 1.01) |                     | 0.87 (0.75, 1.01) |                     | 0.86 (0.74, 1)    |                     | 0.87 (0.75, 1.01) |                     | 0.87 (0.75, 1.01) |
| High          |                     | 0.83 (0.71, 0.96) |                     | 0.82 (0.7, 0.96)  |                     | 0.82 (0.7, 0.95)  |                     | 0.83 (0.71, 0.97) |                     | 0.82 (0.7, 0.95)  |
| Very High     |                     | 0.84 (0.72, 0.99) |                     | 0.85 (0.73, 1)    |                     | 0.83 (0.71, 0.97) |                     | 0.85 (0.72, 0.99) |                     | 0.84 (0.72, 0.98) |
| Low           | 5                   | 0.83 (0.72, 0.96) | 15                  | 0.86 (0.74, 1)    | 25                  | 0.87 (0.75, 1.01) | 35                  | 0.85 (0.73, 0.99) | 45                  | 0.85 (0.73, 0.99) |
| Moderate      |                     | 0.86 (0.74, 0.99) |                     | 0.88 (0.76, 1.02) |                     | 0.87 (0.74, 1.01) |                     | 0.86 (0.74, 1)    |                     | 0.88 (0.76, 1.02) |
| High          |                     | 0.8 (0.69, 0.94)  |                     | 0.83 (0.71, 0.97) |                     | 0.83 (0.71, 0.97) |                     | 0.84 (0.71, 0.98) |                     | 0.83 (0.71, 0.97) |
| Very High     |                     | 0.83 (0.71, 0.98) |                     | 0.85 (0.72, 1)    |                     | 0.82 (0.7, 0.97)  |                     | 0.81 (0.69, 0.96) |                     | 0.87 (0.74, 1.02) |
| Low           | 6                   | 0.85 (0.73, 0.98) | 16                  | 0.86 (0.74, 1)    | 26                  | 0.85 (0.73, 0.98) | 36                  | 0.85 (0.73, 0.99) | 46                  | 0.87 (0.75, 1)    |
| Moderate      |                     | 0.87 (0.75, 1.01) |                     | 0.86 (0.74, 1)    |                     | 0.88 (0.75, 1.02) |                     | 0.85 (0.73, 0.99) |                     | 0.88 (0.76, 1.02) |
| High          |                     | 0.83 (0.71, 0.96) |                     | 0.82 (0.7, 0.95)  |                     | 0.82 (0.7, 0.96)  |                     | 0.81 (0.69, 0.95) |                     | 0.84 (0.72, 0.97) |
| Very High     |                     | 0.84 (0.72, 0.99) |                     | 0.85 (0.73, 1)    |                     | 0.83 (0.7, 0.97)  |                     | 0.83 (0.7, 0.98)  |                     | 0.86 (0.73, 1)    |
| Low           | 7                   | 0.85 (0.74, 0.99) | 17                  | 0.85 (0.73, 0.99) | 27                  | 0.85 (0.73, 0.98) | 37                  | 0.82 (0.71, 0.96) |                     |                   |
| Moderate      |                     | 0.87 (0.75, 1.01) |                     | 0.89 (0.77, 1.04) |                     | 0.86 (0.74, 1)    |                     | 0.87 (0.75, 1.01) |                     |                   |
| High          |                     | 0.83 (0.71, 0.96) |                     | 0.82 (0.7, 0.96)  |                     | 0.84 (0.72, 0.99) |                     | 0.83 (0.71, 0.96) |                     |                   |
| Very High     |                     | 0.84 (0.72, 0.99) |                     | 0.84 (0.72, 0.99) |                     | 0.85 (0.73, 1)    |                     | 0.85 (0.72, 0.99) |                     |                   |
| Low           | 8                   | 0.85 (0.73, 0.98) | 18                  | 0.85 (0.74, 0.99) | 28                  | 0.85 (0.73, 0.98) | 38                  | 0.85 (0.73, 0.98) |                     |                   |
| Moderate      |                     | 0.87 (0.75, 1.01) |                     | 0.88 (0.76, 1.02) |                     | 0.87 (0.75, 1.01) |                     | 0.87 (0.75, 1.01) |                     |                   |
| High          |                     | 0.82 (0.71, 0.96) |                     | 0.83 (0.71, 0.97) |                     | 0.83 (0.71, 0.97) |                     | 0.83 (0.71, 0.96) |                     |                   |
| Very High     |                     | 0.84 (0.72, 0.99) |                     | 0.86 (0.73, 1.01) |                     | 0.84 (0.72, 0.99) |                     | 0.84 (0.72, 0.99) |                     |                   |
| Low           | 9                   | 0.84 (0.72, 0.97) | 19                  | 0.85 (0.73, 0.98) | 29                  | 0.84 (0.73, 0.98) | 39                  | 0.85 (0.73, 0.98) |                     |                   |
| Moderate      |                     | 0.88 (0.76, 1.03) |                     | 0.87 (0.75, 1.01) |                     | 0.86 (0.75, 1)    |                     | 0.87 (0.75, 1.01) |                     |                   |
| High          |                     | 0.82 (0.7, 0.95)  |                     | 0.83 (0.71, 0.96) |                     | 0.82 (0.71, 0.96) |                     | 0.83 (0.71, 0.96) |                     |                   |
| Very High     |                     | 0.87 (0.74, 1.02) |                     | 0.84 (0.72, 0.98) |                     | 0.85 (0.72, 0.99) |                     | 0.84 (0.72, 0.99) |                     |                   |
| Low           | 10                  | 0.85 (0.73, 0.98) | 20                  | 0.83 (0.71, 0.97) | 30                  | 0.85 (0.73, 0.98) | 40                  | 0.85 (0.73, 0.98) |                     |                   |
| Moderate      |                     | 0.87 (0.75, 1.01) |                     | 0.9 (0.77, 1.04)  |                     | 0.87 (0.75, 1.01) |                     | 0.87 (0.75, 1.01) |                     |                   |
| High          |                     | 0.82 (0.71, 0.96) |                     | 0.85 (0.72, 0.99) |                     | 0.82 (0.71, 0.96) |                     | 0.82 (0.71, 0.96) |                     |                   |
| Very High     |                     | 0.85 (0.72, 0.99) |                     | 0.86 (0.73, 1.01) |                     | 0.84 (0.72, 0.99) |                     | 0.84 (0.72, 0.99) |                     |                   |

**eTable 9:** “Leave-one-out” analyses for the association of Child Opportunity Index (ChOI) in early childhood with asthma incidence. All incidence rate ratios (IRR) and 95% confidence intervals are relative to the very low opportunity category.

| ChOI category | Excluded cohort no. | IRR (95% CI)      |
|---------------|---------------------|-------------------|---------------------|-------------------|---------------------|-------------------|---------------------|-------------------|---------------------|-------------------|
| Low           | 1                   | 0.8 (0.69, 0.93)  | 11                  | 0.8 (0.69, 0.93)  | 21                  | 0.8 (0.69, 0.94)  | 31                  | 0.8 (0.69, 0.93)  | 41                  | 0.81 (0.69, 0.94) |
| Moderate      |                     | 0.91 (0.79, 1.06) |                     | 0.91 (0.78, 1.05) |                     | 0.91 (0.79, 1.06) |                     | 0.91 (0.78, 1.05) |                     | 0.92 (0.79, 1.06) |
| High          |                     | 0.8 (0.68, 0.93)  |                     | 0.8 (0.68, 0.93)  |                     | 0.8 (0.68, 0.93)  |                     | 0.8 (0.68, 0.93)  |                     | 0.79 (0.68, 0.92) |
| Very High     |                     | 0.81 (0.69, 0.95) |                     | 0.81 (0.69, 0.95) |                     | 0.81 (0.69, 0.95) |                     | 0.81 (0.69, 0.95) |                     | 0.8 (0.68, 0.94)  |
| Low           | 2                   | 0.78 (0.67, 0.91) | 12                  | 0.8 (0.69, 0.93)  | 22                  | 0.8 (0.69, 0.93)  | 32                  | 0.8 (0.69, 0.93)  | 42                  | 0.8 (0.69, 0.93)  |
| Moderate      |                     | 0.92 (0.79, 1.07) |                     | 0.91 (0.78, 1.05) |                     | 0.92 (0.79, 1.06) |                     | 0.91 (0.78, 1.05) |                     | 0.91 (0.78, 1.06) |
| High          |                     | 0.77 (0.66, 0.91) |                     | 0.79 (0.68, 0.92) |                     | 0.79 (0.68, 0.93) |                     | 0.79 (0.68, 0.92) |                     | 0.79 (0.68, 0.92) |
| Very High     |                     | 0.81 (0.69, 0.95) |                     | 0.81 (0.69, 0.94) |                     | 0.81 (0.69, 0.95) |                     | 0.81 (0.69, 0.94) |                     | 0.81 (0.69, 0.95) |
| Low           | 3                   | 0.8 (0.69, 0.94)  | 13                  | 0.8 (0.69, 0.93)  | 23                  | 0.79 (0.67, 0.92) | 33                  | 0.8 (0.69, 0.93)  | 43                  | 0.79 (0.68, 0.92) |
| Moderate      |                     | 0.91 (0.78, 1.06) |                     | 0.9 (0.78, 1.05)  |                     | 0.89 (0.76, 1.04) |                     | 0.91 (0.78, 1.05) |                     | 0.91 (0.78, 1.06) |
| High          |                     | 0.79 (0.68, 0.93) |                     | 0.8 (0.68, 0.93)  |                     | 0.79 (0.67, 0.93) |                     | 0.79 (0.68, 0.93) |                     | 0.79 (0.68, 0.93) |
| Very High     |                     | 0.81 (0.69, 0.95) |                     | 0.81 (0.69, 0.95) |                     | 0.8 (0.68, 0.94)  |                     | 0.8 (0.69, 0.94)  |                     | 0.82 (0.69, 0.96) |
| Low           | 4                   | 0.8 (0.69, 0.93)  | 14                  | 0.8 (0.69, 0.93)  | 24                  | 0.81 (0.69, 0.94) | 34                  | 0.8 (0.69, 0.93)  | 44                  | 0.8 (0.69, 0.93)  |
| Moderate      |                     | 0.91 (0.78, 1.05) |                     | 0.91 (0.78, 1.05) |                     | 0.9 (0.77, 1.04)  |                     | 0.91 (0.78, 1.05) |                     | 0.91 (0.78, 1.05) |
| High          |                     | 0.8 (0.68, 0.93)  |                     | 0.79 (0.67, 0.92) |                     | 0.79 (0.68, 0.93) |                     | 0.8 (0.68, 0.93)  |                     | 0.79 (0.67, 0.92) |
| Very High     |                     | 0.8 (0.69, 0.94)  |                     | 0.82 (0.7, 0.96)  |                     | 0.79 (0.67, 0.93) |                     | 0.81 (0.69, 0.95) |                     | 0.8 (0.68, 0.94)  |
| Low           | 5                   | 0.78 (0.67, 0.91) | 15                  | 0.82 (0.7, 0.96)  | 25                  | 0.82 (0.71, 0.96) | 35                  | 0.79 (0.67, 0.92) | 45                  | 0.81 (0.69, 0.94) |
| Moderate      |                     | 0.9 (0.77, 1.05)  |                     | 0.92 (0.79, 1.07) |                     | 0.91 (0.78, 1.06) |                     | 0.91 (0.78, 1.06) |                     | 0.92 (0.79, 1.07) |
| High          |                     | 0.77 (0.66, 0.91) |                     | 0.8 (0.69, 0.94)  |                     | 0.81 (0.69, 0.94) |                     | 0.8 (0.68, 0.94)  |                     | 0.81 (0.69, 0.95) |
| Very High     |                     | 0.81 (0.69, 0.95) |                     | 0.81 (0.69, 0.96) |                     | 0.81 (0.69, 0.95) |                     | 0.79 (0.67, 0.94) |                     | 0.84 (0.71, 0.98) |
| Low           | 6                   | 0.79 (0.68, 0.92) | 16                  | 0.81 (0.7, 0.95)  | 26                  | 0.8 (0.69, 0.93)  | 36                  | 0.8 (0.68, 0.93)  | 46                  | 0.8 (0.69, 0.93)  |
| Moderate      |                     | 0.9 (0.78, 1.05)  |                     | 0.9 (0.77, 1.05)  |                     | 0.9 (0.78, 1.05)  |                     | 0.89 (0.76, 1.04) |                     | 0.91 (0.78, 1.05) |
| High          |                     | 0.79 (0.68, 0.93) |                     | 0.8 (0.68, 0.93)  |                     | 0.78 (0.66, 0.91) |                     | 0.78 (0.66, 0.92) |                     | 0.79 (0.68, 0.93) |
| Very High     |                     | 0.8 (0.68, 0.94)  |                     | 0.82 (0.7, 0.96)  |                     | 0.78 (0.66, 0.92) |                     | 0.79 (0.67, 0.93) |                     | 0.81 (0.69, 0.94) |
| Low           | 7                   | 0.8 (0.69, 0.93)  | 17                  | 0.8 (0.68, 0.93)  | 27                  | 0.8 (0.69, 0.94)  | 37                  | 0.78 (0.67, 0.91) |                     | 0.81 (0.69, 0.95) |
| Moderate      |                     | 0.91 (0.79, 1.06) |                     | 0.94 (0.8, 1.09)  |                     | 0.91 (0.78, 1.06) |                     | 0.91 (0.79, 1.06) |                     | 0.91 (0.79, 1.06) |
| High          |                     | 0.8 (0.68, 0.93)  |                     | 0.79 (0.68, 0.93) |                     | 0.8 (0.68, 0.94)  |                     | 0.8 (0.68, 0.93)  |                     | 0.8 (0.68, 0.93)  |
| Very High     |                     | 0.81 (0.69, 0.95) |                     | 0.8 (0.68, 0.95)  |                     | 0.81 (0.69, 0.96) |                     | 0.81 (0.69, 0.95) |                     | 0.81 (0.69, 0.95) |
| Low           | 8                   | 0.8 (0.69, 0.93)  | 18                  | 0.81 (0.69, 0.94) | 28                  | 0.79 (0.68, 0.92) | 38                  | 0.8 (0.69, 0.93)  |                     | 0.81 (0.69, 0.95) |
| Moderate      |                     | 0.91 (0.78, 1.05) |                     | 0.92 (0.79, 1.07) |                     | 0.9 (0.77, 1.04)  |                     | 0.91 (0.78, 1.05) |                     | 0.91 (0.78, 1.05) |
| High          |                     | 0.79 (0.68, 0.92) |                     | 0.8 (0.69, 0.94)  |                     | 0.79 (0.68, 0.92) |                     | 0.79 (0.68, 0.93) |                     | 0.79 (0.68, 0.93) |
| Very High     |                     | 0.81 (0.69, 0.95) |                     | 0.82 (0.7, 0.97)  |                     | 0.8 (0.68, 0.94)  |                     | 0.81 (0.69, 0.95) |                     | 0.81 (0.69, 0.95) |
| Low           | 9                   | 0.81 (0.69, 0.94) | 19                  | 0.8 (0.69, 0.93)  | 29                  | 0.81 (0.69, 0.94) | 39                  | 0.8 (0.69, 0.93)  |                     | 0.81 (0.69, 0.95) |
| Moderate      |                     | 0.91 (0.78, 1.06) |                     | 0.91 (0.78, 1.05) |                     | 0.89 (0.77, 1.04) |                     | 0.91 (0.78, 1.05) |                     | 0.91 (0.78, 1.05) |
| High          |                     | 0.79 (0.67, 0.92) |                     | 0.79 (0.68, 0.93) |                     | 0.79 (0.67, 0.92) |                     | 0.79 (0.68, 0.93) |                     | 0.79 (0.68, 0.93) |
| Very High     |                     | 0.82 (0.7, 0.96)  |                     | 0.81 (0.69, 0.95) |                     | 0.81 (0.69, 0.95) |                     | 0.81 (0.69, 0.95) |                     | 0.81 (0.69, 0.95) |
| Low           | 10                  | 0.8 (0.68, 0.93)  | 20                  | 0.82 (0.7, 0.96)  | 30                  | 0.8 (0.69, 0.93)  | 40                  | 0.8 (0.69, 0.93)  |                     | 0.81 (0.69, 0.95) |
| Moderate      |                     | 0.9 (0.78, 1.05)  |                     | 0.91 (0.78, 1.07) |                     | 0.91 (0.78, 1.05) |                     | 0.91 (0.78, 1.05) |                     | 0.91 (0.78, 1.05) |
| High          |                     | 0.79 (0.68, 0.93) |                     | 0.81 (0.69, 0.95) |                     | 0.79 (0.68, 0.93) |                     | 0.79 (0.68, 0.93) |                     | 0.79 (0.68, 0.93) |
| Very High     |                     | 0.81 (0.69, 0.95) |                     | 0.83 (0.71, 0.98) |                     | 0.81 (0.69, 0.94) |                     | 0.81 (0.69, 0.95) |                     | 0.81 (0.69, 0.95) |

**eFigure 1:** Association of domain-specific Child Opportunity Index (ChOI) at birth, infancy, and early childhood with asthma incidence. All incidence rate ratios and 95% confidence intervals are relative to the very low ChOI category and adjusted for sociodemographics, parental asthma history, parity, prenatal cigarette smoking, prenatal second-hand smoke exposure, pre-pregnancy body mass index, mode of delivery, and gestational age.

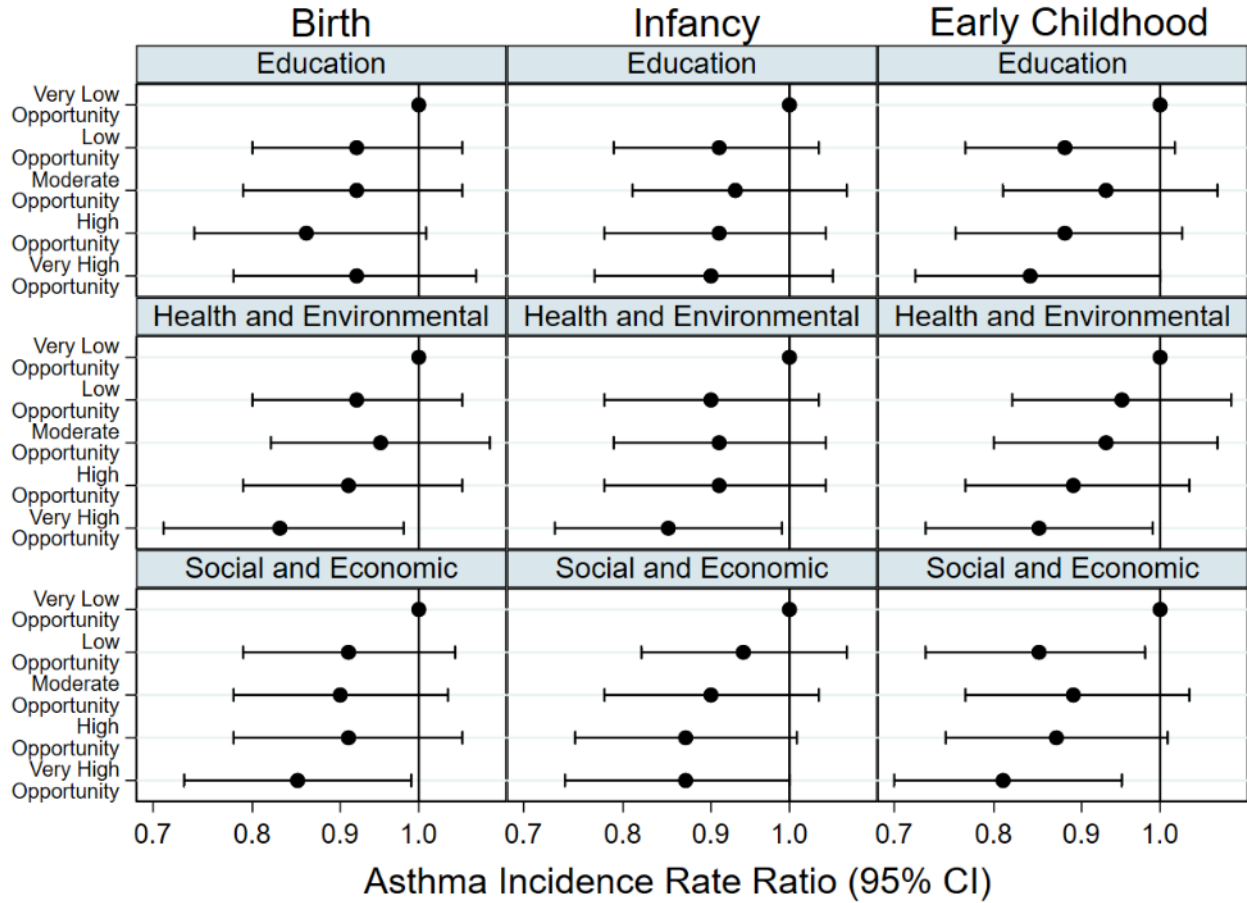

**eFigure 2:** Association of domain-specific Social Vulnerability Index (SVI) at birth, infancy, and early childhood with asthma incidence. All incidence rate ratios and 95% confidence intervals are relative to the very high SVI category and adjusted for sociodemographics, parental asthma history, parity, prenatal cigarette smoking, prenatal second-hand smoke exposure, pre-pregnancy BMI, mode of delivery, and gestational age.

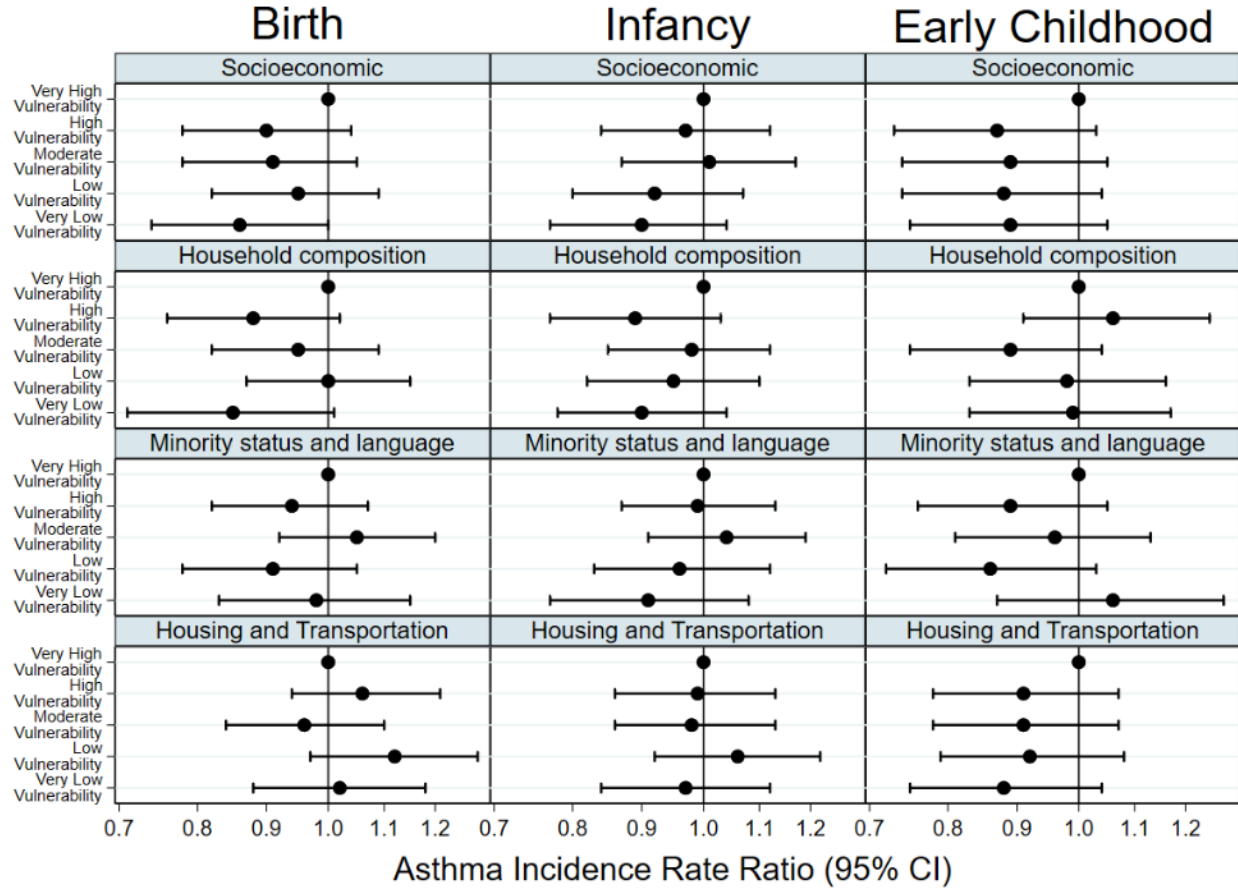

**eMethods:** Description of Child Opportunity Index and Social Vulnerability Index.

### ***Child Opportunity Index***

Researchers at Brandeis University developed the ChOI version 2.0 as a summary measure of the quality of neighborhoods in which children live across the US.<sup>1</sup> This index quantifies 29 indicators of neighborhood conditions that impact children’s healthy development, drawn from public sources and grouped into three domains: education; health and environment; social and economic. The developers calculated domain-specific and overall ChOI scores for a total of 72,195 census tracts across 50 US states and Washington D.C. The scores were standardized at the national level such that higher scores reflect more favorable neighborhood opportunities relative to other neighborhoods across the US. The researchers also generated percentile ranks for each census tract based on domain-specific and overall ChOI scores, ranging from 1<sup>st</sup> (lowest opportunity) to 100<sup>th</sup> percentile (highest opportunity).

### ***Social Vulnerability Index***

The Centers for Disease Control and Prevention (CDC) developed and validated the SVI to identify high risk populations that are especially vulnerable in the face of a stressor or during public health emergencies.<sup>2</sup> This index is derived from 15 US Census variables grouped into four domains: socioeconomic status; household composition and disability; racial/ethnic minority and language status; and housing and transportation type. For each census tract, the CDC generated percentile ranks, ranging from 0 (lowest vulnerability) to 1 (highest vulnerability), for all 15 variables collectively (i.e., overall SVI) and for each of the four domains, relative to all tracts across 50 states and Washington DC.

### **eReferences**

1. Acevedo-Garcia D, Noelke C, McArdle N, et al. Racial And Ethnic Inequities In Children's Neighborhoods: Evidence From The New Child Opportunity Index 2.0. *Health Aff (Millwood)*. 2020;39(10):1693-1701.
2. Flanagan BE, Hallisey EJ, Adams E, Lavery A. Measuring Community Vulnerability to Natural and Anthropogenic Hazards: The Centers for Disease Control and Prevention's Social Vulnerability Index. *J Environ Health*. 2018;80(10):34-36.
