# Supplementary material
Source: PubMed Central journal article supplement (PMC10463174)
Supplement: jamapediatr-e233133-s002.pdf [file jamapediatr-e233133-s002.pdf]

## Supplemental Online Content: Nonauthor Collaborators

\*First name, last name, and suffix (if applicable) are required and will appear in PubMed.

| <b>*Group Name(s): Environmental Influences on Child Health Outcomes</b> |                   |                              |                  |                                                                          |                                          |                                                         |                                                                                            |
|--------------------------------------------------------------------------|-------------------|------------------------------|------------------|--------------------------------------------------------------------------|------------------------------------------|---------------------------------------------------------|--------------------------------------------------------------------------------------------|
| <b>*First Name and Middle Initial(s)</b>                                 | <b>*Last Name</b> | <b>*Suffix (eg, Jr, III)</b> | Academic Degrees | Institution                                                              | Location (city, state/province, country) | Role or Contribution, eg, chair, principal investigator | Group (if more than 1 Group listed in the byline) and/or Subgroup (eg, Steering Committee) |
| Samia                                                                    | Baluch            |                              |                  | Duke Clinical Research Institute                                         | Durham, NC                               | Coordinating Center                                     |                                                                                            |
| Timothy                                                                  | Shields           |                              |                  | Johns Hopkins University Bloomberg School of Public Health               | Baltimore, MD                            | Coordinating Center                                     |                                                                                            |
| Stephanie                                                                | Merhar            |                              |                  | Cincinnati Children's Hospital Medical Center                            | Cincinnati, Ohio                         | Principal Investigator                                  |                                                                                            |
| Clement                                                                  | Ren               |                              |                  | Indiana University, Riley Hospital for Children                          | Indianapolis, IN                         | Principal Investigator                                  |                                                                                            |
| Gloria                                                                   | Pryhuber          |                              |                  | University of Rochester Medical Center                                   | Rochester, NY                            | Principal Investigator                                  |                                                                                            |
| Paul                                                                     | Moore             |                              |                  | Vanderbilt Children's Hospital                                           | Nashville, TN                            | Principal Investigator                                  |                                                                                            |
| Rajan                                                                    | Wadhawan          |                              |                  | Florida Hospital for Children                                            | Orlando, FL                              | Principal Investigator                                  |                                                                                            |
| Carol                                                                    | Wagner            |                              |                  | Medical University of South Carolina                                     | Charleston, SC                           | Principal Investigator                                  |                                                                                            |
| John R                                                                   | Keller            |                              |                  | University of Arkansas for Medical Science                               | Little Rock, AK                          | Principal Investigator                                  |                                                                                            |
| Amy                                                                      | Reynolds          |                              |                  | University of Buffalo, Jacobs School of Medicine and Biomedical Sciences | Buffalo, NY                              | Principal Investigator                                  |                                                                                            |
| Roberta                                                                  | Keller            |                              |                  | University California, San Francisco                                     | San Francisco, CA                        | Principal Investigator                                  |                                                                                            |
| Mark                                                                     | Hudak             |                              |                  | University of Florida College of Medicine                                | Jacksonville, FL                         | Principal Investigator                                  |                                                                                            |
| Adam                                                                     | Duncan            |                              |                  | University of Texas Health Sciences Center                               | Houston, TX                              | Principal Investigator                                  |                                                                                            |
| Ronald                                                                   | Walshburn         |                              |                  | Wake Forest University School of Medicine                                | Winston Salem, NC                        | Principal Investigator                                  |                                                                                            |
| Susan L                                                                  | Teitelbaum        |                              |                  | Icahn School of Medicine at Mount Sinai                                  | New York, NY                             | Principal Investigator                                  |                                                                                            |
| Annemarie                                                                | Stroustrup        |                              |                  | Icahn School of Medicine at Mount Sinai                                  | New York, NY                             | Principal Investigator                                  |                                                                                            |

## Supplemental Online Content: Nonauthor Collaborators

\*First name, last name, and suffix (if applicable) are required and will appear in PubMed.

| *First Name and Middle Initial(s) | *Last Name      | *Suffix (eg, Jr, III) | Academic Degrees | Institution                                     | Location (city, state/province, country) | Role or Contribution, eg, chair, principal investigator | Group (if more than 1 Group listed in the byline) and/or Subgroup (eg, Steering Committee) |
|-----------------------------------|-----------------|-----------------------|------------------|-------------------------------------------------|------------------------------------------|---------------------------------------------------------|--------------------------------------------------------------------------------------------|
| Andrea                            | Lampland        |                       |                  | Children's Hospital and Clinic                  | Minneapolis, MN                          | Principal Investigator                                  |                                                                                            |
| Dennis                            | Mayock          |                       |                  | University of Washington                        | Seattle, WA                              | Principal Investigator                                  |                                                                                            |
| Jonathan                          | Mansbach        |                       |                  | Boston Children's Hospital                      | Boston, MA                               | Principal Investigator                                  |                                                                                            |
| Jonathan                          | Spergel         |                       |                  | Children's Hospital of Philadelphia             | Philadelphia, PA                         | Principal Investigator                                  |                                                                                            |
| Michelle                          | Stevenson       |                       |                  | Norton Children's Hospital                      | Louisville, KY                           | Principal Investigator                                  |                                                                                            |
| Cindy                             | Bauer           |                       |                  | Phoenix Children's Hospital                     | Phoenix, AZ                              | Principal Investigator                                  |                                                                                            |
| James                             | Gern            |                       |                  | University of Wisconsin                         | Madison, WI                              | Principal Investigator                                  |                                                                                            |
| Christine                         | Seroogy         |                       |                  | Marshfield Clinic Research Institute            | Marshfield, WI                           | Principal Investigator                                  |                                                                                            |
| Casper                            | Bendixsen       |                       |                  | Marshfield Clinic Research Institute            | Marshfield, WI                           | Principal Investigator                                  |                                                                                            |
| Irva                              | Hertz-Picciotto |                       |                  | University of California Davis Mind Institute   | Sacramento, CA                           | Principal Investigator                                  |                                                                                            |
| Catherine                         | Karr            |                       |                  | University of Washington                        | Seattle, WA                              | Principal Investigator                                  |                                                                                            |
| Alex                              | Mason           |                       |                  | University of Tennessee Health Science Center   | Memphis, TN                              | Principal Investigator                                  |                                                                                            |
| Scott                             | Weiss           |                       |                  | Brigham and Women's Hospital                    | Boston, MA                               | Principal Investigator                                  |                                                                                            |
| George                            | O'Connor        |                       |                  | Boston University Medical Center                | Boston, MA                               | Principal Investigator                                  |                                                                                            |
| Robert                            | Zeiger          |                       |                  | Kaiser Permanente, Southern California          | San Diego, CA                            | Principal Investigator                                  |                                                                                            |
| Leonard                           | Bacharier       |                       |                  | Washington University of St. Louis              | St Louis, MO                             | Principal Investigator                                  |                                                                                            |
| Brian                             | Carter          |                       |                  | Children's Mercy                                | Kansas City, MO                          | Principal Investigator                                  |                                                                                            |
| Carmen                            | Marsit          |                       |                  | Emory University                                | Atlanta, GA                              | Principal Investigator                                  |                                                                                            |
| Steven                            | Pastyrnak       |                       |                  | Helen DeVos, Children's Hospital                | Grand Rapids, MI                         | Principal Investigator                                  |                                                                                            |
| Charles                           | Neal            |                       |                  | Kapiolani Medical Center for Women and Children | Providence, RI                           | Principal Investigator                                  |                                                                                            |
| Lynne                             | Smith           |                       |                  | Harbour-UCLA Medical Center                     | Los Angeles, CA                          | Principal Investigator                                  |                                                                                            |
| Jennifer                          | Helderman       |                       |                  | Wake Forest University School of Medicine       | Winston Salem, NC                        | Principal Investigator                                  |                                                                                            |
| Robert                            | Tepper          |                       |                  | Indiana University, Riley Hospital for Children | Indianapolis, IN                         | Principal Investigator                                  |                                                                                            |

## Supplemental Online Content: Nonauthor Collaborators

\*First name, last name, and suffix (if applicable) are required and will appear in PubMed.

| *First Name and Middle Initial(s) | *Last Name    | *Suffix (eg, Jr, III) | Academic Degrees | Institution                                      | Location (city, state/province, country) | Role or Contribution, eg, chair, principal investigator | Group (if more than 1 Group listed in the byline) and/or Subgroup (eg, Steering Committee) |
|-----------------------------------|---------------|-----------------------|------------------|--------------------------------------------------|------------------------------------------|---------------------------------------------------------|--------------------------------------------------------------------------------------------|
| Craig                             | Newschaffer   |                       |                  | Pennsylvania State University                    | University Park, PA                      | Principal Investigator                                  |                                                                                            |
| Heather                           | Volk          |                       |                  | Johns Hopkins Bloomberg School of Public Health  | Baltimore, MD                            | Principal Investigator                                  |                                                                                            |
| Rebecca                           | Schmidt       |                       |                  | University of California, Davis                  | Sacramento, CA                           | Principal Investigator                                  |                                                                                            |
| Jean                              | Kerver        |                       |                  | Michigan State University                        | East Lansing, MI                         | Principal Investigator                                  |                                                                                            |
| Charles                           | Barone        |                       |                  | Henry Ford Health System                         | Detroit, MI                              | Principal Investigator                                  |                                                                                            |
| Patricia                          | McKane        |                       |                  | Michigan Department of Health and Human Services | Lansing, MI                              | Principal Investigator                                  |                                                                                            |
| Nigel                             | Paneth        |                       |                  | Michigan State University                        | East Lansing, MI                         | Principal Investigator                                  |                                                                                            |
| Michael                           | Elliott       |                       |                  | University of Michigan                           | Ann Arbor, MI                            | Principal Investigator                                  |                                                                                            |
| Susan                             | Schantz       |                       |                  | University of Illinois, Beckman Institute        | Urbana, IL                               | Principal Investigator                                  |                                                                                            |
| Christina                         | Porucznik     |                       |                  | University of Utah                               | Salt Lake City, UT                       | Principal Investigator                                  |                                                                                            |
| Robert                            | Silver        |                       |                  | University of Utah                               | Salt Lake City, UT                       | Principal Investigator                                  |                                                                                            |
| Elisabeth                         | Conrad        |                       |                  | University of Utah                               | Salt Lake City, UT                       | Principal Investigator                                  |                                                                                            |
| Michelle                          | Bosquet-Enlow |                       |                  | Boston Children's Hospital                       | Boston, MA                               | Principal Investigator                                  |                                                                                            |
| Kathi                             | Huddleston    |                       |                  | George Mason University                          | Fairfax, VA                              | Principal Investigator                                  |                                                                                            |
| Nicki                             | Bush          |                       |                  | University of California, San Francisco          | San Francisco, CA                        | Principal Investigator                                  |                                                                                            |
| Ruby                              | Nguyen        |                       |                  | University of Minnesota                          | Minneapolis, MN                          | Principal Investigator                                  |                                                                                            |
| Emily                             | Barrett       |                       |                  | University of Rochester Medical Center           | Rochester, NY                            | Principal Investigator                                  |                                                                                            |
| Alison                            | Hipwell       |                       |                  | University of Pittsburgh                         | Pittsburgh, PA                           | Principal Investigator                                  |                                                                                            |
| Kate                              | Keenan        |                       |                  | University of Pittsburgh                         | Pittsburgh, PA                           | Principal Investigator                                  |                                                                                            |
| Christiane                        | Duarte        |                       |                  | New York State Psychiatric Institute             | New York, NY                             | Principal Investigator                                  |                                                                                            |
| Glorisa                           | Canino        |                       |                  | University of Puerto Rico                        | San Jaun, PR                             | Principal Investigator                                  |                                                                                            |
| Stephen                           | Dager         |                       |                  | University of Washington                         | Seattle, WA                              | Principal Investigator                                  |                                                                                            |
| Robert                            | Schultz       |                       |                  | Children's Hospital of Philadelphia              | Philadelphia, PA                         | Principal Investigator                                  |                                                                                            |
| Joseph                            | Piven         |                       |                  | University of North Carolina at Chapel Hill      | Chapel Hill, NC                          | Principal Investigator                                  |                                                                                            |

Supplemental Online Content: Nonauthor Collaborators

\*First name, last name, and suffix (if applicable) are required and will appear in PubMed.

| <b>*First Name and Middle Initial(s)</b> | <b>*Last Name</b> | <b>*Suffix (eg, Jr, III)</b> | Academic Degrees | Institution                                                     | Location (city, state/province, country) | Role or Contribution, eg, chair, principal investigator | Group (if more than 1 Group listed in the byline) and/or Subgroup (eg, Steering Committee) |
|------------------------------------------|-------------------|------------------------------|------------------|-----------------------------------------------------------------|------------------------------------------|---------------------------------------------------------|--------------------------------------------------------------------------------------------|
| Hyagriv                                  | Simhan            |                              |                  | University of Pittsburgh Medical Center, Magee Women's Hospital | Pittsburgh, PA                           | Principal Investigator                                  |                                                                                            |
| Frank                                    | Gilliland         |                              |                  | University of Southern California                               | Los Angeles, CA                          | Principal Investigator                                  |                                                                                            |
| Shoreh                                   | Farzan            |                              |                  | University of Southern California                               | Los Angeles, CA                          | Principal Investigator                                  |                                                                                            |
| Tracy                                    | Bastain           |                              |                  | University of Southern California                               | Los Angeles, CA                          | Principal Investigator                                  |                                                                                            |
