# Supplementary material
Source: PubMed Central journal article supplement (PMC10463174)
Supplement: jamapediatr-e233133-s003.pdf [file jamapediatr-e233133-s003.pdf]

## Data Sharing Statement

Aris. Neighborhood Opportunity and Vulnerability and Incident Asthma Among Children. *JAMA Pediatr.* Published August 28, 2023. doi:10.1001/jamapediatrics.2023.3133

### Data

**Data available:** Yes

**Data types:** Deidentified participant data

**How to access data:** <https://dash.nichd.nih.gov/study/417122>

**When available:** With publication

### Supporting Documents

**Document types:** None

### Additional Information

**Who can access the data:** Researchers whose proposed use of the data has been approved

**Types of analyses:** For any purpose or for a specified purpose

**Mechanisms of data availability:** After approval of a proposal with a signed data access agreement
